# Supplementary material for: Zn uptake, translocation and grain Zn loading in rice (Oryza sativa L.) genotypes selected for Zn deficiency tolerance and high grain Zn
Source: PubMed Central journal article supplement — J Exp Bot. 2013 May 22;64(10):2739–51. doi: 10.1093/jxb/ert118 (PMC3697949; doi:10.1093/jxb/ert118), 2013-05-22
Supplement: supp_ert118_jexbot095331_file001.pdf [file supp_ert118_jexbot095331_file001.pdf]

Supplementary Table S1: Correlation coefficients for the association of Zn efficiency with different traits in both experiments 2 and 3 at early vegetative stage.

|                                                       | <b>Experiment 2</b>               | <b>Experiment 3</b>               |
|-------------------------------------------------------|-----------------------------------|-----------------------------------|
| Initial seed Zn concentration (mg kg <sup>-1</sup> )  | r = 0.626 <sup>NS</sup><br>(n=10) | r = -0.099 <sup>NS</sup><br>(n=4) |
| Leaf deficiency symptom scores                        | R = -0.12 <sup>NS</sup><br>(n=25) | r = -0.14 <sup>NS</sup><br>(n=10) |
| Root to shoot Zn translocation (%)                    | r = 0.5**<br>(n=25)               | r = 0.6*<br>(n=12)                |
| Total Zn uptake (µg plant <sup>-1</sup> )             | r = 0.19 <sup>NS</sup><br>(n=23)  | r = 0.78**<br>(n=13)              |
| Max. root length (cm)                                 | r = 0.12 <sup>NS</sup><br>(n=26)  | r = -0.01 <sup>NS</sup><br>(n=15) |
| Shoot Zn concentration (mg kg <sup>-1</sup> )         | r = 0.02 <sup>NS</sup><br>(n=25)  | ND                                |
| Leaf blade Zn concentration (mg kg <sup>-1</sup> )    | ND                                | r = 0.46 <sup>NS</sup><br>(n=15)  |
| Stem + sheath Zn concentration (mg kg <sup>-1</sup> ) | ND                                | r = 0.04 <sup>NS</sup><br>(n=15)  |
| Root Zn concentration (mg kg <sup>-1</sup> )          | r = -0.06 <sup>NS</sup><br>(n=25) | r = 0.04 <sup>NS</sup><br>(n=15)  |

\*\*\*, \*\* and \* indicate significant correlations at  $p \leq 0.001$ , 0.01, and 0.05, respectively. NS = non-significant. ND= not determined.

Supplementary Table S2: Shoot and root Zn concentration, total Zn content per plant, and root-to-shoot Zn translocation index at early vegetative stage under Zn-sufficient and Zn-deficient conditions in experiment 2

| Genotype            | Shoot Zn concentration<br>(mg kg <sup>-1</sup> ) |                  | Root Zn concentration<br>(mg kg <sup>-1</sup> ) |                    | Total Zn content<br>(µg plant <sup>-1</sup> ) |                  | Root-to-shoot Zn<br>translocation index (%) |              |
|---------------------|--------------------------------------------------|------------------|-------------------------------------------------|--------------------|-----------------------------------------------|------------------|---------------------------------------------|--------------|
|                     | Zn-<br>sufficient                                | Zn-<br>deficient | Zn-<br>sufficient                               | Zn-<br>deficient   | Zn-<br>sufficient                             | Zn-<br>deficient | Zn-<br>sufficient                           | Zn-deficient |
| IR64                | 18.5                                             | 7.0              | 39.5                                            | 13.0               | 38.7                                          | 24.6             | 58                                          | 57           |
| IR68144             | 36.0                                             | 12.7             | 20.0                                            | 14.5               | 29.9                                          | 8.7              | 82                                          | 61           |
| IR74                | 19.0                                             | 6.4              | 21.5                                            | 13.3               | 68.7                                          | 24.2             | 66                                          | 53           |
| IR82247             | 18.3                                             | 8.0              | 15.5                                            | 13.7               | 46.0                                          | 23.9             | 78                                          | 62           |
| IR69428             | 23.7                                             | 11.0             | 23.0                                            | 13.5               | 63.6                                          | 27.3             | 73                                          | 57           |
| IR75862             | 23.7                                             | 8.0              | 23.7                                            | 11.0               | 43.5                                          | 18.2             | 73                                          | 66           |
| Jalmagna            | 12.7                                             | 5.6              | 13.5                                            | 13.6               | 69.7                                          | 34.7             | 80                                          | 53           |
| Joryoongbyeon       | 22.7                                             | 9.5              | 21.5                                            | 11.7               | 46.0                                          | 17.7             | 75                                          | 70           |
| RIL-46              | 21.0                                             | 6.5              | 34.5                                            | 12.0               | 72.0                                          | 21.4             | 73                                          | 61           |
| SWHOO               | 19.7                                             | 9.5              | 21.0                                            | 14.3               | 51.6                                          | 27.3             | 76                                          | 68           |
| 5% HSD genotype     |                                                  | 4.1***           |                                                 | 10.0 <sup>NS</sup> |                                               | 10.5***          |                                             | 10***        |
| 5% LSD Zn treatment |                                                  | 1.0***           |                                                 | 2.7***             |                                               | 2.8***           |                                             | 3***         |
| 5% HSD (G X Zn)     |                                                  | 6.7***           |                                                 | 16.2**             |                                               | 17***            |                                             | 15**         |

Values given are means ± SE (n = 3). \*\*\*, \*\* indicate significant differences at p ≤ 0.001 and 0.01, respectively.

Supplementary Table S3: Different plant tissue Zn concentration, total Zn content per plant, and root-to-shoot Zn translocation index at early vegetative stage under Zn-sufficient and Zn-deficient conditions in experiment 3

| Genotype            | Leaf blade Zn concentration (mg kg <sup>-1</sup> ) |              | Stem and sheath Zn concentration (mg kg <sup>-1</sup> ) |              | Root Zn concentration (mg kg <sup>-1</sup> ) |              | Total Zn content (µg plant <sup>-1</sup> ) |              | Root-to-shoot Zn translocation index (%) |              |
|---------------------|----------------------------------------------------|--------------|---------------------------------------------------------|--------------|----------------------------------------------|--------------|--------------------------------------------|--------------|------------------------------------------|--------------|
|                     | Zn-sufficient                                      | Zn-deficient | Zn-sufficient                                           | Zn-deficient | Zn-sufficient                                | Zn-deficient | Zn-sufficient                              | Zn-deficient | Zn-sufficient                            | Zn-deficient |
| A69-1               | 36.0                                               | 10.5         | 120.4                                                   | 10.4         | 29.8                                         | 15.6         | 82.0                                       | 8.0          | 87                                       | 68           |
| IR55179             | 45.0                                               | 10.4         | 107.2                                                   | 10.7         | 34.0                                         | 14.5         | 76.4                                       | 9.8          | 85                                       | 65           |
| IR69428             | 53.8                                               | 12.6         | 105.2                                                   | 10.3         | 42.5                                         | 16.3         | 72.2                                       | 7.3          | 83                                       | 65           |
| KP                  | 47.0                                               | 10.7         | 145.3                                                   | 8.6          | 21.3                                         | 14.8         | 113.0                                      | 7.0          | 85                                       | 64           |
| 5% LSD genotype     |                                                    | 2.7***       |                                                         | 6.8***       |                                              | 5.0*         |                                            | 3.5***       |                                          | 5 NS         |
| 5% LSD Zn treatment |                                                    | 1.9***       |                                                         | 4.8***       |                                              | 3.5***       |                                            | 2.4***       |                                          | 3***         |
| 5% HSD (G X Zn)     |                                                    | 6.0***       |                                                         | 15.6***      |                                              | 11.3 NS      |                                            | 8.0***       |                                          | 10 NS        |

Values are means ± SE (n = 5). \*\*\*, \*\*, \* indicate significant difference at p ≤ 0.001, 0.01, and 0.05, respectively.

Supplementary Table S4: Different plant tissue Zn concentration at 50% flowering under Zn-sufficient and Zn-deficient conditions

| Geno name           | Leaf blade Zn concentration (mg kg <sup>-1</sup> ) |              | Stem and sheath Zn concentration (mg kg <sup>-1</sup> ) |              | Root Zn Concentration (mg kg <sup>-1</sup> ) |              | Panicle Zn concentration (mg kg <sup>-1</sup> ) |              |
|---------------------|----------------------------------------------------|--------------|---------------------------------------------------------|--------------|----------------------------------------------|--------------|-------------------------------------------------|--------------|
|                     | Zn-sufficient                                      | Zn-deficient | Zn-sufficient                                           | Zn-deficient | Zn-sufficient                                | Zn-deficient | Zn-sufficient                                   | Zn-deficient |
| <u>Experiment 2</u> |                                                    |              |                                                         |              |                                              |              |                                                 |              |
| IR64                | 24 ± 2                                             | 27 ± 5       | 26 ± 1                                                  | 37 ± 18      | 48 ± 8                                       | 58 ± 12      | 39 ± 0.5                                        | 35 ± 2       |
| IR68144             | 33 ± 5                                             | 21 ± 3       | 28 ± 6                                                  | 14 ± 1       | 36 ± 4                                       | 27 ± 5       | 50 ± 0                                          | 31 ± 0       |
| IR74                | 26 ± 1                                             | 17 ± 1       | 25 ± 3                                                  | 33 ± 9       | 60 ± 16                                      | 44 ± 19      | 34 ± 0.4                                        | 30 ± 1.5     |
| IR82247             | 22 ± 0                                             | 19 ± 2       | 19 ± 3.7                                                | 24 ± 7       | 34 ± 10                                      | 106 ± 14     | 47 ± 11                                         | 42 ± 0       |
| IR69428             | 25 ± 2                                             | 22 ± 2       | 22 ± 2                                                  | 21 ± 1       | 75 ± 5                                       | 41 ± 9       | 62 ± 0                                          | 49 ± 0       |
| IR75862             | 22 ± 2                                             | 17 ± 2       | 19 ± 2                                                  | 13 ± 3       | 66 ± 15                                      | 53 ± 14      | 49 ± 0                                          | 18 ± 4       |
| Joryoongbyeo        | 23 ± 3                                             | 19 ± 1       | 29 ± 8                                                  | 30 ± 11      | 78 ± 15                                      | 56 ± 16      | 75 ± 2                                          | 57 ± 0       |
| RIL-46              | 18 ± 3                                             | 17 ± 0       | 21 ± 2                                                  | 18 ± 5       | 22 ± 6                                       | 62 ± 24      | 49 ± 4                                          | 30 ± 4       |
| SWHOO               | 39 ± 14                                            | 23 ± 4       | 41.2 ± 14                                               | 26 ± 7       | 57 ± 11                                      | 51 ± 8       | 55 ± 6                                          | 50 ± 6       |
| <u>Experiment 3</u> |                                                    |              |                                                         |              |                                              |              |                                                 |              |
| A69-1               | 19 ± 1                                             | 11 ± 1       | 29 ± 2                                                  | 8 ± 2        | 131 ± 13                                     | 14 ± 0.3     | 35 ± 1                                          | 9 ± 2        |
| IR55179             | 22 ± 2                                             | 13 ± 1       | 23 ± 4                                                  | 8 ± 1        | 166 ± 10                                     | 23 ± 4       | 29 ± 1                                          | 8 ± 0.2      |
| IR69428             | 26 ± 2                                             | 14 ± 1       | 29 ± 6                                                  | 10 ± 2       | 179 ± 22                                     | 20 ± 4       | 46 ± 2                                          | 19 ± 3       |
| KP                  | 23 ± 3                                             |              | 24 ± 8                                                  |              | 150 ± 46                                     | -            | 27 ± 3                                          | -            |

Supplementary Table S5: Different plant tissue Zn concentration at maturity under Zn-sufficient and Zn-deficient conditions

| Geno name           | Root Zn concentration (mg kg <sup>-1</sup> ) |              | Stem and sheath Zn concentration (mg kg <sup>-1</sup> ) |              | Leaf blade Zn concentration (mg kg <sup>-1</sup> ) |              | Rachis Zn concentration (mg kg <sup>-1</sup> ) |              | Brown rice Zn concentration (mg kg <sup>-1</sup> ) |              |
|---------------------|----------------------------------------------|--------------|---------------------------------------------------------|--------------|----------------------------------------------------|--------------|------------------------------------------------|--------------|----------------------------------------------------|--------------|
|                     | Zn-sufficient                                | Zn-deficient | Zn-sufficient                                           | Zn-deficient | Zn-sufficient                                      | Zn-deficient | Zn-sufficient                                  | Zn-deficient | Zn-sufficient                                      | Zn-deficient |
| <u>Experiment 2</u> |                                              |              |                                                         |              |                                                    |              |                                                |              |                                                    |              |
| IR64                | 55 ± 9                                       | 92 ± 5       | 24 ± 3                                                  | 17 ± 2       | 23 ± 1                                             | 22 ± 2       | 15 ± 1                                         | 9 ± 1        | 26 ± 2                                             | 17 ± 2       |
| IR68144             | 91 ± 10                                      | 160 ± 40     | 32 ± 1                                                  | 15 ± 2       | 26 ± 2                                             | 19 ± 1       | 19 ± 2                                         | 9 ± 1        | 24 ± 1                                             | 12 ± 0.9     |
| IR74                | 40 ± 6                                       | 86 ± 8       | 26 ± 2                                                  | 20 ± 1       | 24 ± 2                                             | 20 ± 2       | 21 ± 2                                         | 15 ± 1       | 21 ± 2                                             | 16 ± 1.5     |
| IR82247             | 66 ± 3                                       | 100 ± 4      | 26 ± 4                                                  | 18 ± 2       | 23 ± 1                                             | 19 ± 1       | 19 ± 3                                         | 13 ± 1       | 18 ± 2                                             | 16 ± 2       |
| IR69428             | 87 ± 10                                      | 130 ± 8      | 23 ± 1                                                  | 17 ± 2       | 24 ± 2                                             | 21 ± 2       | 28 ± 6                                         | 17 ± 0       | 35 ± 4                                             | 23 ± 1       |
| IR75862             | 62 ± 4                                       | 89 ± 7       | 18 ± 2                                                  | 13 ± 2       | 19 ± 1                                             | 17 ± 1       | 34 ± 12                                        | 9 ± 1        | 29 ± 4                                             | 18 ± 6.5     |
| Joryoongbyeon       | 74 ± 8                                       | 107 ± 2      | 19 ± 1                                                  | 18 ± 4       | 17 ± 2                                             | 15 ± 1       | 29 ± 4                                         | 27 ± 2       | 33 ± 3                                             | 35 ± 3       |
| RIL-46              | 30 ± 1                                       | 92 ± 6       | 22 ± 2                                                  | 15 ± 3       | 22 ± 2                                             | 18 ± 2       | 13 ± 0.5                                       | 9 ± 2        | 26 ± 1                                             | 20 ± 3       |
| SWHOO               | 47 ± 2                                       | 125 ± 8      | 21 ± 1                                                  | 12 ± 1       | 17 ± 2                                             | 14 ± 1       | 30 ± 5                                         | 11 ± 1       | 38 ± 0.6                                           | 32 ± 3       |
| <u>Experiment 3</u> |                                              |              |                                                         |              |                                                    |              |                                                |              |                                                    |              |
| A69-1               | 349 ± 24                                     | 31 ± 3       | 24 ± 1                                                  | 13 ± 4       | 20 ± 1                                             | 13 ± 1       | 16 ± 1                                         | 8 ± 1        | 32 ± 2                                             | 10 ± 2       |
| IR55179             | 391 ± 36                                     | 34 ± 4       | 24 ± 4                                                  | 8 ± 0.4      | 22 ± 2                                             | 13 ± 1       | 13 ± 2                                         | 5 ± 1        | 20 ± 2                                             | 7 ± 2        |
| IR69428             | 465 ± 41                                     | 43 ± 9       | 23 ± 3                                                  | 13 ± 2       | 22 ± 2                                             | 17 ± 1       | 56 ± 11                                        | 16 ± 3       | 30 ± 3                                             | 18 ± 1       |
| KP                  | 224 ± 28                                     |              | 20 ± 2                                                  |              | 22 ± 2                                             |              | 8 ± 1                                          |              | 12 ± 2                                             | -            |
